# Supplementary material for: Influence of Drought and Heat Stress on Mineral Content, Antioxidant Activity and Bioactive Compound Accumulation in Four African Amaranthus Species
Source: MDPI journal article supplement (doi:10.3390/plants12040953), 2023-02-20
Supplement: s1 [file s1]

**Appendix SA:** Total phenolic and flavonoids compounds contents detected in Methanol (MeOH) and aqueous leaves extracts of *Amaranthus* species grown under WW and DI conditions (µg/g). ND (not detected). Data are shown as mean ± standard deviation and different letters in the same row indicate significant differences ( $p \leq 0.05$ ).

[illegible]
